# Supplementary material for: Metal–organic framework-derived Zn0.975Co0.025S/CoS2 embedded in N,S-codoped carbon nanotube/nanopolyhedra as an efficient electrocatalyst for overall water splitting
Source: Royal Society of Chemistry journal article supplement (doi:10.1039/c8ta01370e), 2018-01-01
Supplement: c8ta01370e1.pdf [file c8ta01370e1.pdf]

## Supporting Information:

### **Metal-Organic Framework-Derived $\text{Zn}_{0.975}\text{Co}_{0.025}\text{S}/\text{CoS}_2$ Embedded in N, S-codoped Carbon nanotube/nanopolyhedra as Efficient Electrocatalyst for Overall Water Splitting**

Zhou Yu,<sup>a, b</sup> Yu Bai,<sup>\*b, c</sup> Shimin Zhang,<sup>a</sup> Yuxuan Liu,<sup>a</sup> Naiqing Zhang,<sup>b, d</sup> and Kening Sun,<sup>\*b, d</sup>

<sup>a</sup> School of Chemistry and Chemical Engineering, Harbin Institute of Technology, Harbin, 150090, P. R. China

<sup>b</sup> Academy of Fundamental and Interdisciplinary Sciences, Harbin Institute of Technology, Harbin, 150090, P. R. China

<sup>c</sup> Advanced Research Institute for Multidisciplinary Science, Beijing Institute of Technology, Beijing, 100081, P. R. China

<sup>d</sup> State Key laboratory of Urban Water Resource and Environment, Harbin Institute of Technology, Harbin, 150090, P. R. China

\*E-mail: [yubaiit@163.com](mailto:yubaiit@163.com) (Y Bai)

\*E-mail: [keningsunhit@126.com](mailto:keningsunhit@126.com) (KN Sun)

## **1 EXPERIMENTAL**

### **1.1 Synthesis of ZnCo-ZIFs and ZIF-67**

All the chemicals were directly used after purchase without further purification. In a typical preparation, 4 mmol  $\text{Co}(\text{NO}_3)_2 \cdot 6\text{H}_2\text{O}$  and 2 mmol  $\text{Zn}(\text{NO}_3)_2 \cdot 6\text{H}_2\text{O}$  were dissolved into 40 mL of methanol (MeOH) and solution was then added into 30 mL of MeOH containing 24 mmol 2-methylimidazole (MeIM) under string. The mixed solution was placed at 25 °C for 24 h. The as-obtained powders were centrifuged with ethanol and dried in vacuum overnight to obtain the ZnCo-ZIFs. The preparation of ZIF-67 was performed with a similar process to ZnCo-ZIFs in the absence of  $\text{Zn}(\text{NO}_3)_2 \cdot 6\text{H}_2\text{O}$ .

### **1.2 Synthesis of $\text{Co}_3\text{ZnC}/\text{Co-NCNT/NP}$ , $\text{Co-NCNT/NP}$ and $\text{Co}_3\text{ZnC}/\text{Co-NCNP}$**

The as-prepared ZnCo-ZIFs precursors were placed in a ceramic boat, and then heated in a tube furnace at a ramp rate of 5 °C/min to 600 °C under  $\text{Ar}/\text{H}_2$  flow (95%/5% in volume ratio) for 1 h. After cooling naturally, the black product of  $\text{Co}_3\text{ZnC}/\text{Co-NCNT/NP}$  was finally collected. The  $\text{Co-NCNT/NP}$  was obtained by treating ZIF-67 in the similar chemical vapor reduction and deposition process. The same procedure was conducted to convert ZnCo-ZIFs to  $\text{Co}_3\text{ZnC}/\text{Co-NCNP}$  by calcination under  $\text{Ar}_2$  atmosphere.

### **1.3 Synthesis of $\text{ZnCoS-NSCNT/NP}$ , $\text{CoS}_2\text{-NSCNT/NP}$ and $\text{ZnCoS-NSNP}$**

The resulting  $\text{Co}_3\text{ZnC}/\text{Co-NCNT/NP}$  (0.1 g) was put in a tube furnace, and 0.6 g S powder was placed at the upstream side. Then, the temperature of the furnace was elevated to 600 °C at a rate of 2 °C  $\text{min}^{-1}$  and maintained for 2 h in a tube furnace

under a  $N_2$  flow. After the furnace was cooled to room temperature, the ZnCoS-NSCNT/NP was obtained. The  $CoS_2$ -NSCNT/NP and ZnCoS-NSNP products were obtained using similar preparation process with Co-NCNT/NP and  $Co_3ZnC/Co$ -NCNP as the precursor, respectively

#### **1.4 Characterization**

Field emission scanning electron microscopy (FESEM) images were obtained on a Hitachi S-8010 scanning electron microscope. Transmission electron microscopy (TEM), high-resolution TEM (HRTEM), and energy-dispersive X-ray (EDX) elemental mapping images were all recorded on a FEI Tecnai G2 F30 (200 kV) high-resolution transmission electron microscope. X-ray diffraction (XRD) characterization was carried out on a PANalytical X'Pert PRO with Cu K $\alpha$  radiation. X-ray photoelectron spectra (XPS) were obtained with a K-Alpha electron spectrometer (Thermofish Scientific Company) using Al K $\alpha$  (1486.6 eV) radiation. The surface area was measured by the Brunauer-Emmett-Teller (BET) method using ASAP2020.

#### **1.5 Electrochemical test**

Electrocatalytic activity evaluations were performed in a  $O_2$ -purged within the solution of 1 M KOH with a three-electrode system. The glassy carbon (GC) electrode (3 mm diameter) was utilized as the working electrode. The saturated Ag/AgCl electrode (SCE) was used as the reference electrode, and Pt mesh or a graphite electrode was used as the counter electrode. 2 mg sample was dispersed in 500  $\mu$ L Nafion (5 wt%) -water-isopropyl alcohol mixture solution with a volume ratio of 0.05 : 4 : 1 by sonicating. Then, 6  $\mu$ L of the dispersion was deposited onto a GC and dried in

air overnight (loading  $\sim 0.21 \text{ mg cm}^{-2}$ ). The linear sweep voltammetry (LSV) was measured at  $5 \text{ mV s}^{-1}$  scanning rate. All the applied potentials were referenced to a reversible hydrogen electrode (RHE) scale. The long-term durability test was performed using chronoamperometry measurements. Cyclic voltammograms (CVs) were measured from 0.20 to 0.30 V *vs.* Ag/AgCl at scanning rates of 5, 10, 20, 40, 60, 80 and  $100 \text{ mV s}^{-1}$ . The overall water splitting performance was measured by Ni ( $1 \times 1 \text{ cm}$ ) foam (NF) as the working electrode to reach a high catalyst loading ( $1 \text{ mg cm}^{-2}$ ). For comparison, the same amount of Pt/C and RuO<sub>2</sub> were also supported on the NF as cathode and anode, respectively, to drive the overall water splitting process.

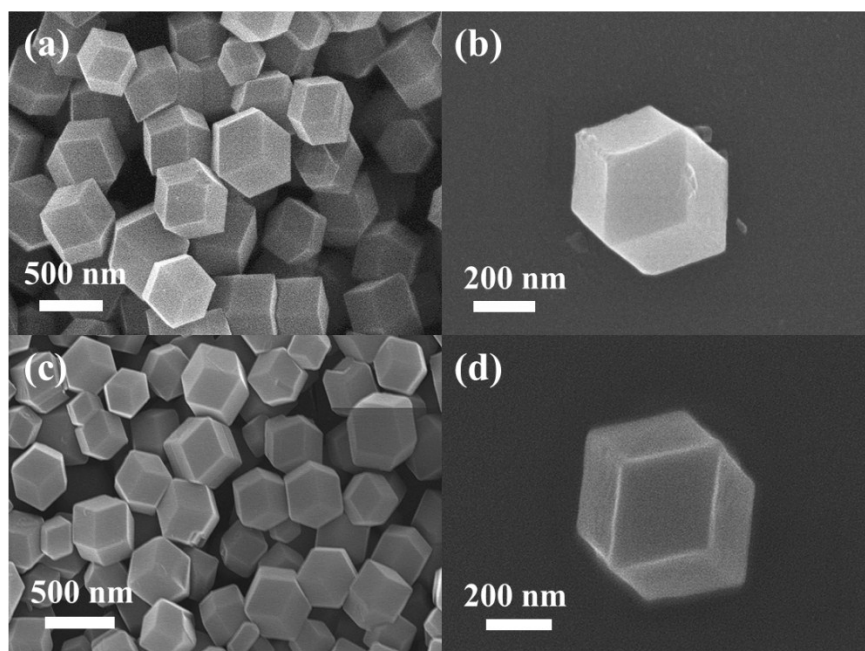

**Fig. S1** SEM images of (a-b) ZnCo-ZIFs and (c-d) ZIF-67.

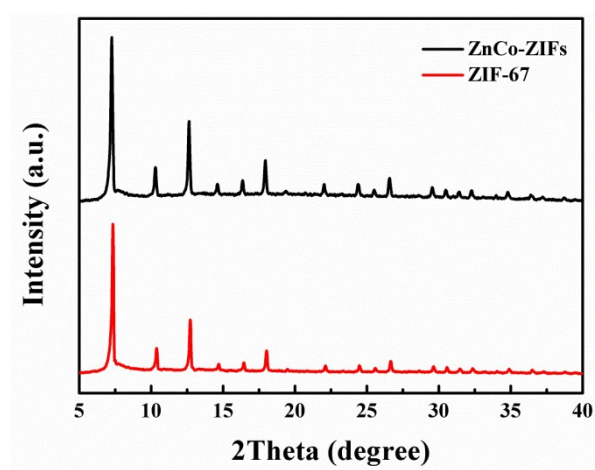

**Fig. S2** XRD patterns of ZnCo-ZIFs and ZIF-67.

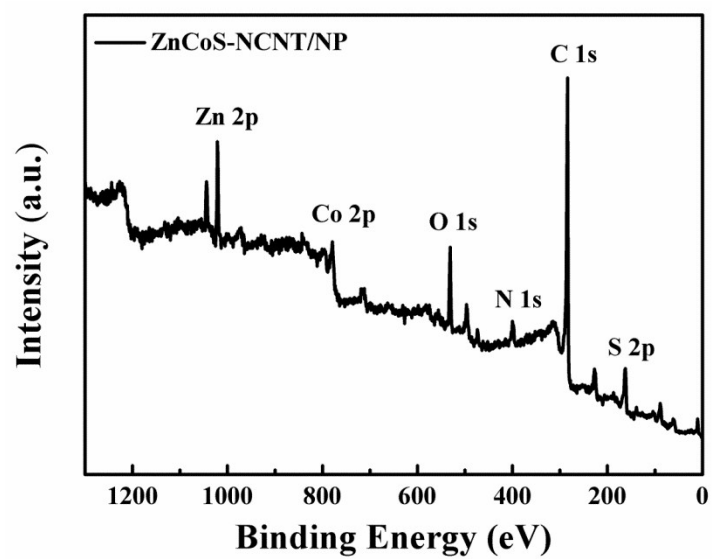

**Fig. S3** Full scan XPS spectrum of ZnCoS-NCNT/NP.

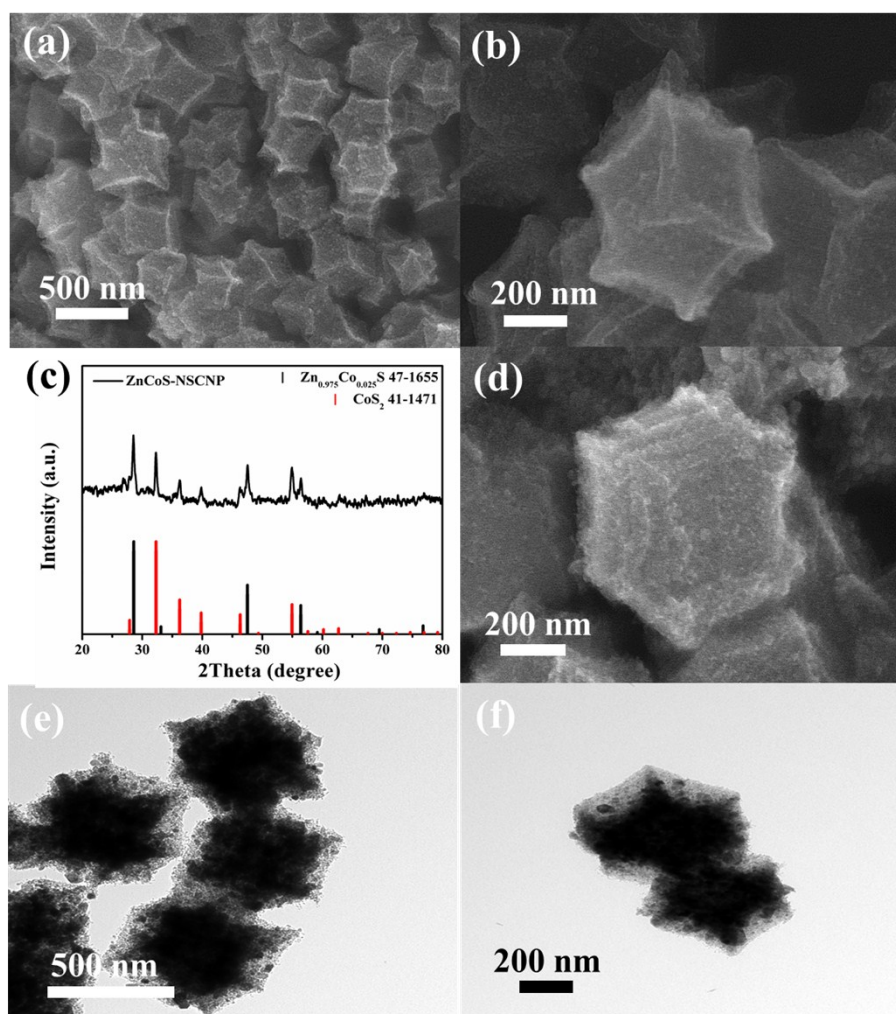

**Fig. S4** (a,b) SEM images of Co<sub>3</sub>ZnC/Co-NCNP. (c) XRD pattern, (d) SEM images, and (e, f) TEM image of ZnCoS-NSCNP.



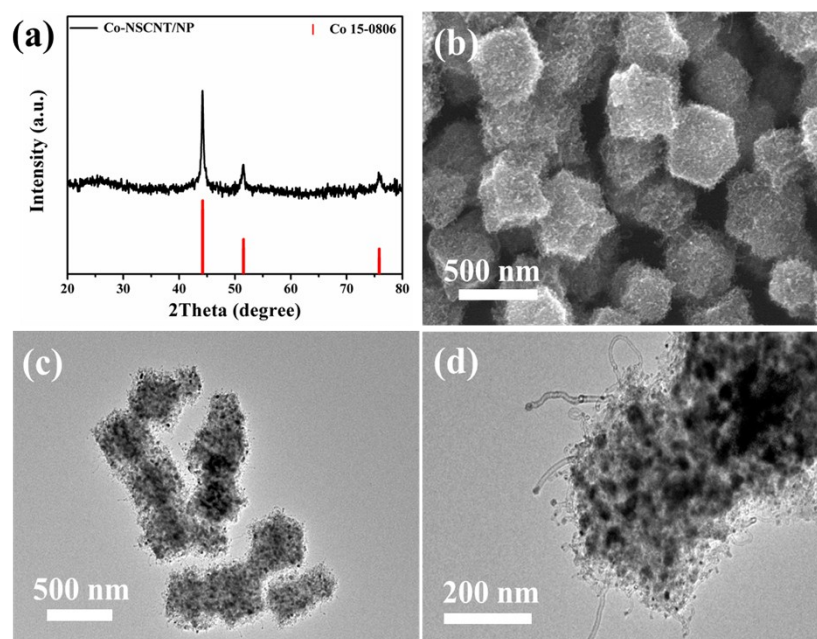

**Fig. S5** (a) XRD patterns, (b) SEM image, and (c, d) TEM images of Co-NSCNT/NP.

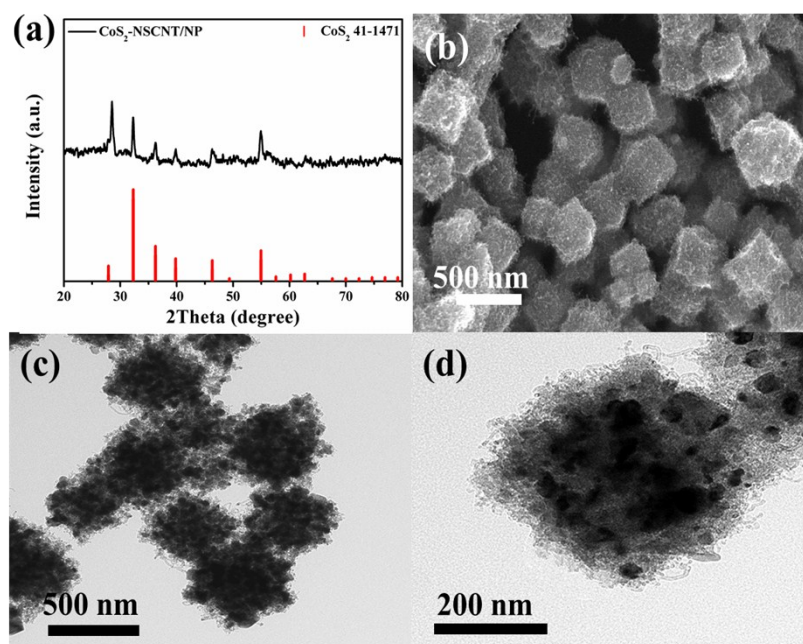

**Fig. S6** (a) XRD patterns, (b) SEM image, and (c, d) TEM images of CoS<sub>2</sub>-NSCNT/NP.

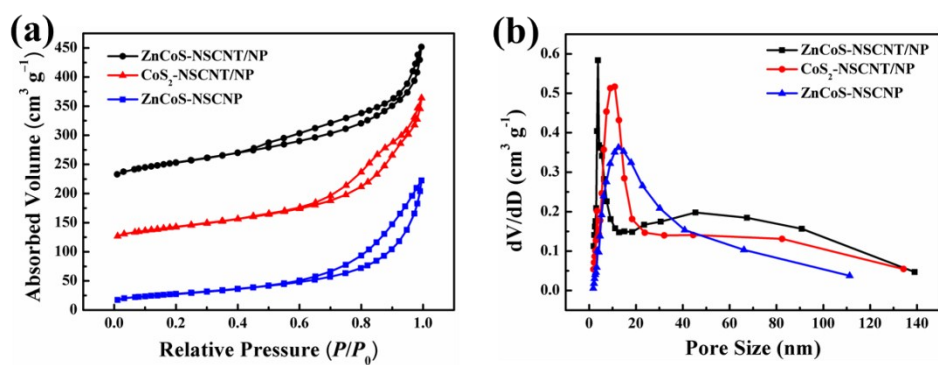

**Fig. S7** (a) Nitrogen adsorption-desorption isotherm, and (b) BJH pore size distribution of ZnCoS-NSCNT/NP, CoS<sub>2</sub>-NSCNT/NP and ZnCoS-NSCNP.

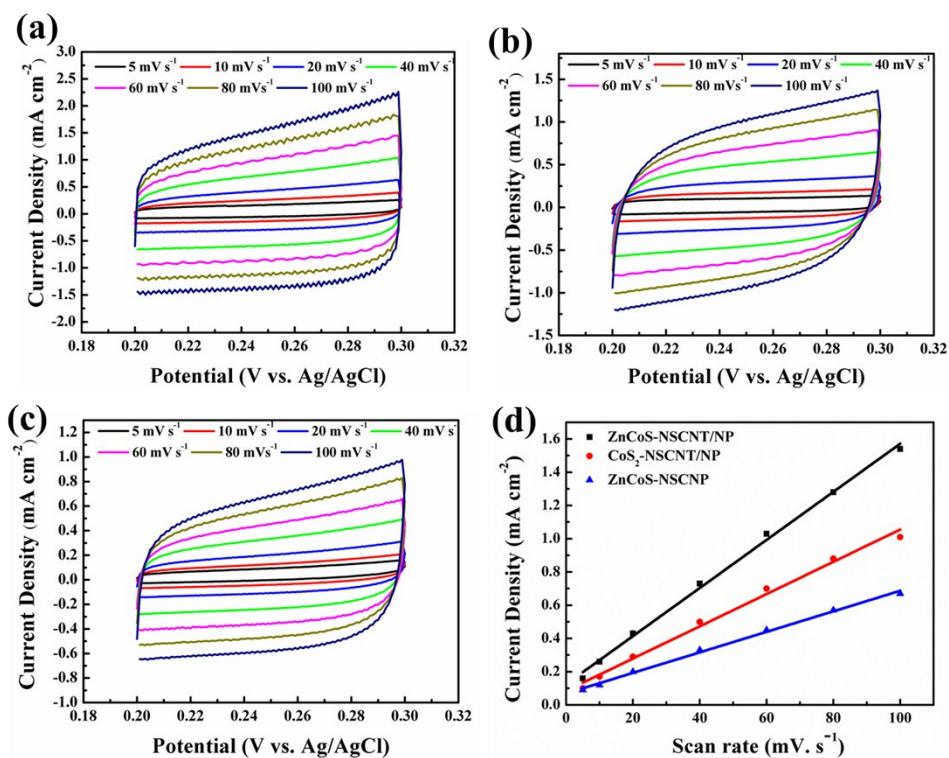

**Fig. S8** Cyclic voltammograms in the double-layer region of the electrodes loaded with (a) ZnCoS-NSCNT/NP, (b) CoS<sub>2</sub>-NSCNT/NP, and (c) ZnCoS-NSCNP. (d) plot of current density vs. scan rate at 0.25 V vs. Ag/AgCl.

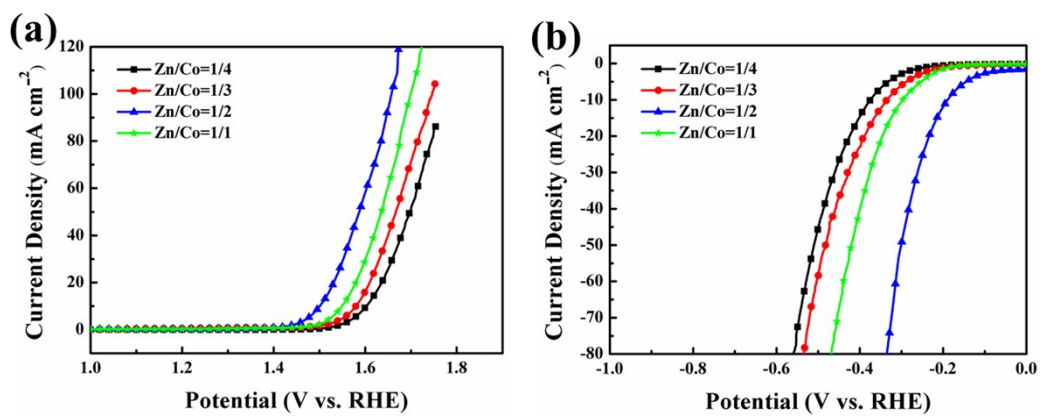

**Fig. S9** (a) and (b) LSV curves of samples prepared with different Zn/Co molar ratios in precursor.

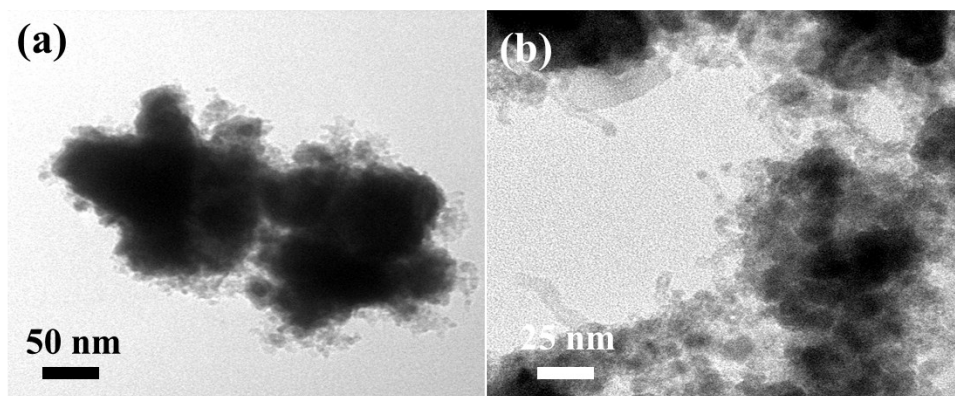

**Fig. S10** (a, b) TEM image of ZnCoS-NSCNT/NP after 40 h of electrolysis in 1M KOH .

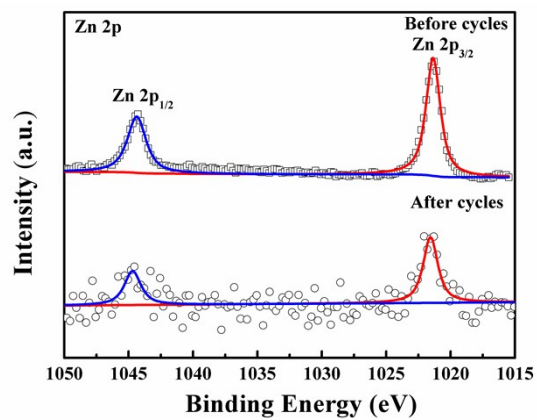

**Fig. S11** High-resolution XPS spectra of Zn 2p before and after cycles in alkaline solution.

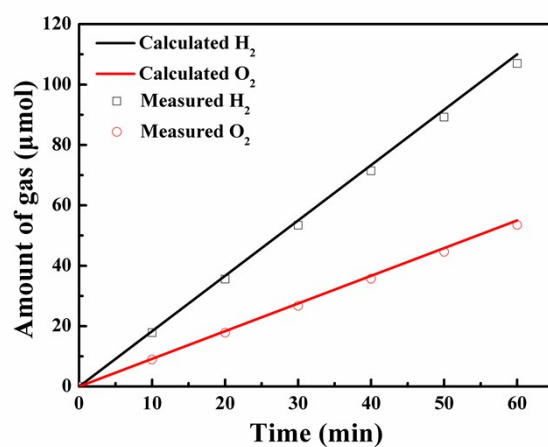

**Fig. S12** The amount of gas theoretically calculated and experimentally measured versus time for overall water splitting of ZnCoS-NSCNT/NP.



**Table S1.** Comparison of electrochemical parameters of Co<sub>3</sub>ZnC/Co-NCCP and

| Electrocatalysts                                        | Overpotential<br>(mV vs. RHE)<br>at 10 mA·cm <sup>-2</sup> | Tafel slope              | Ref       |
|---------------------------------------------------------|------------------------------------------------------------|--------------------------|-----------|
| ZnCoS-NSCNT/NP                                          | 270 mV                                                     | 67 mV dec <sup>-1</sup>  | This work |
| CoP/rGO                                                 | 340 mV                                                     | 66 mV dec <sup>-1</sup>  | S1        |
| NiCo <sub>2</sub> S <sub>4</sub>                        | 337 mV                                                     | 64 mV dec <sup>-1</sup>  | S2        |
| Ni <sub>x</sub> Co <sub>2x</sub> (OH) <sub>6x</sub> @Ni | 305 mV                                                     | 78 mV dec <sup>-1</sup>  | S3        |
| Zn-Co-S/TM                                              | 330 (20 mA cm <sup>-2</sup> )                              | 79 mV dec <sup>-1</sup>  | S4        |
| N-CG-CoO                                                | 340 mV                                                     | 71 mV dec <sup>-1</sup>  | S5        |
| CoS <sub>2</sub> NTA                                    | 276 mV                                                     | 81 mV dec <sup>-1</sup>  | S6        |
| Co@Co <sub>3</sub> O <sub>4</sub> -NC                   | 391 mV                                                     | 102 mV dec <sup>-1</sup> | S7        |

other reported OER catalysts in 1M KOH

**Table S2.** Comparison of electrochemical parameters of Co<sub>3</sub>ZnC/Co-NCCP and other reported HER catalysts in 1M KOH.

| Electrocatalysts                                    | Overpotential<br>(mV vs. RHE)<br>at 10 mA·cm <sup>-2</sup> | Tafel slope              | Ref       |
|-----------------------------------------------------|------------------------------------------------------------|--------------------------|-----------|
| ZnCoS-NSCNT/NP                                      | 152 mV                                                     | 103 mV dec <sup>-1</sup> | This work |
| Zn-Co-S NN/CFP                                      | 234 mV                                                     | 109 mV dec <sup>-1</sup> | S8        |
| MoS <sub>2+x</sub> nanoparticles                    | 310 mV                                                     | 84 mV dec <sup>-1</sup>  | S9        |
| NiSe <sub>2</sub> nanosheets                        | 184 mV                                                     | 184 mV dec <sup>-1</sup> | S10       |
| Co <sub>9</sub> S <sub>8</sub> @MoS <sub>2</sub> /C | 190 mV                                                     | 110 mV dec <sup>-1</sup> | S11       |
| Ni <sub>3</sub> S <sub>2</sub> particles            | 335 mV                                                     | 97 mV dec <sup>-1</sup>  | S12       |
| CP/CTs/Co-S                                         | 190 mV                                                     | 131 mV dec <sup>-1</sup> | S13       |
| NiCo <sub>2</sub> S <sub>4</sub>                    | 260 mV                                                     | 141 mV dec <sup>-1</sup> | S14       |

## REFERENCES

- [S1] L. Jiao, Y. X. Zhou and H. L. Jiang, Chem. Sci., 2016, 7, 1690–1695.
- [S2] J. Y. Jiang, C. Y. Yan, X. H. Zhao, H. X. Luo, Z. M. Xue and T. C. Mu, Green Chem., 2017, 19, 3023–3031.
- [S3] Z. Q. Liu, G. F. Chen, P. L. Zhou, N. Li and Y. Z. Su, J. Power Sources 2016, 317, 1–9.
- [S4] Y. H. Liang, Q. Liu, Y. L. Luo, X. P. Sun, Y. Q. He and A. M. Asiri, Electrochim. Acta 2016, 190, 360–364.

- [S5] S. Mao, Z. Wen, T. Huang, Y. Hou and J. Chen, *Energy Environ. Sci.*, 2014, 7, 609–616.
- [S6] C. Guan, X. M. Liu, A. M. Elshahawy, H. Zhang, H. J. Wu, S. J. Pennycook, and J. Wang, *Nanoscale Horiz.*, 2017, 2, 342–348.
- [S7] C. D. Bai, S. S. Wei, D. R. Deng, X. D. Lin, M. S. Zheng and Q. F. Dong, *J. Mater. Chem. A* 2017, 5, 9533–9536.
- [S8] X. Y. Wu, X. P. Han, X. Y. Ma, W. Zhang, Y. D. Deng, C. Zhong and W. B. Hu *ACS Appl. Mater. Interfaces* 2017, 9, 12574–12583
- [S9] C. G. Morales-Guio, L. Liardet, M. T. Mayer, S. D. Tilley, M. Graetzel and X. Hu, *Angew. Chem. Int. Ed.* 2015, 54, 664–667.
- [S10] H. Liang, L. Li, F. Meng, L. Dang, J. Zhuo, A. Forticaux, Z. Wang and S. Jin, *Chem. Mater.* 2015, 27, 5702–5711.
- [S11] H. Zhu, J. Zhang, R. Y. zhang, M. Du, Q. Wang, G. Gao, J. Wu, G. Wu, M. Zhang, B. Liu, J. Yao and X. Zhang, *Adv. Mater.* 2015, 27, 4752–4759.
- [S12] N. Jiang, Q. Tang, M. Sheng, B. You, D. E. Jiang and Y. Sun, *Catal. Sci. Technol.* 2016, 6, 1077–1084
- [S13] J. Wang, H. X. Zhong, Z. L. Wang, F. L. Meng, X. B. Zhang, *ACS Nano* 2016, 10, 2342–2348.
- [S14] D. Liu, Q. Lu, Y. L. Luo, X. P. Sun and A. M. Asiric, *Nanoscale*, 2015, 7, 15122–15126.
